# Supplementary material for: Dynamic evolution in the key honey bee pathogen deformed wing virus: Novel insights into virulence and competition using reverse genetics
Source: PubMed Central journal article supplement (PMC6805011; doi:10.1371/journal.pbio.3000502), 2019-10-10

**Colony USA 2015.**

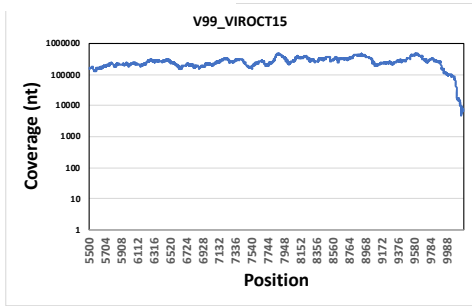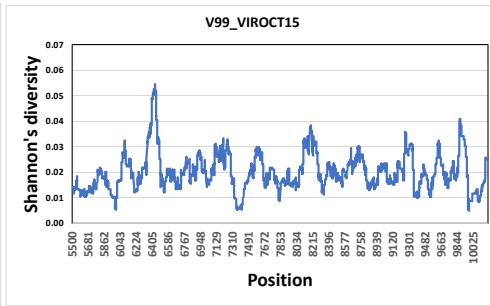

**Colony UK 2013.**

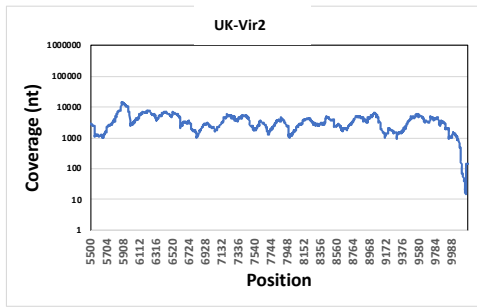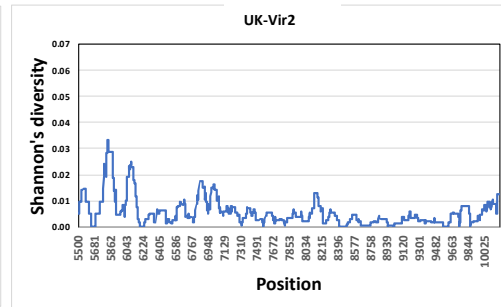

**Group 1. UK 2013 - Wild-type - Low DWV**

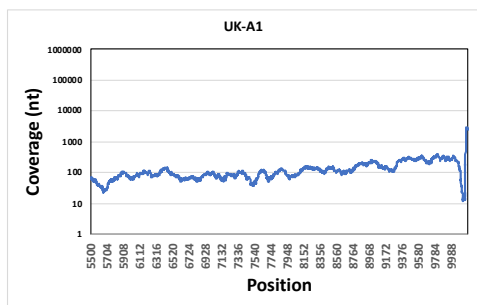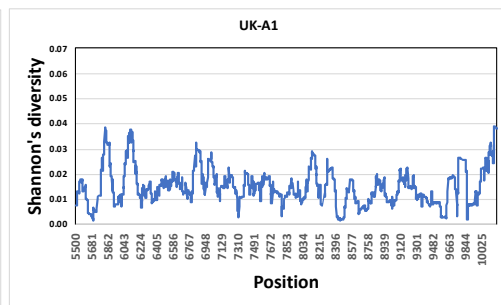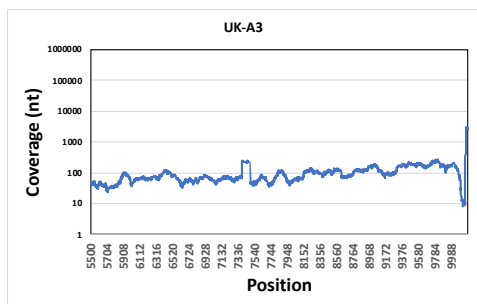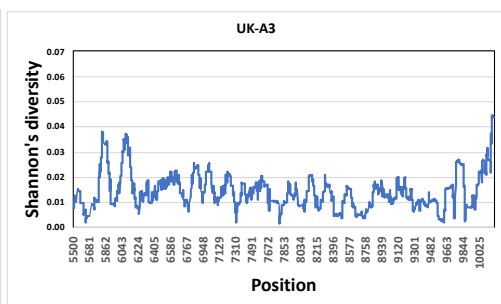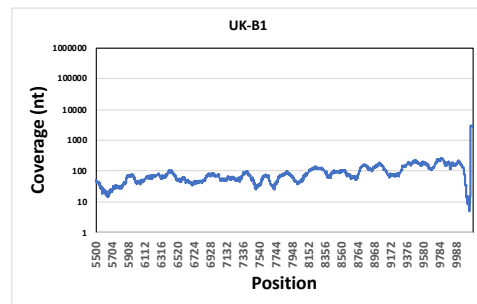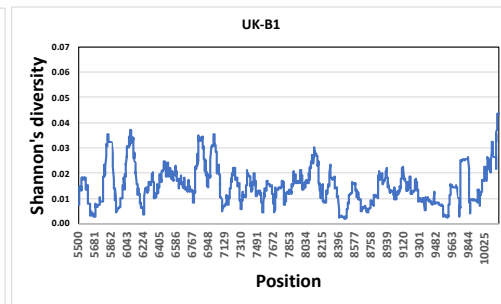

*(continued on next page)*

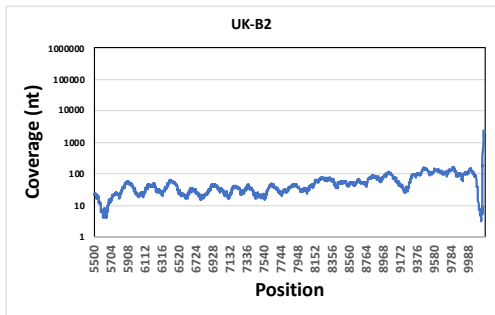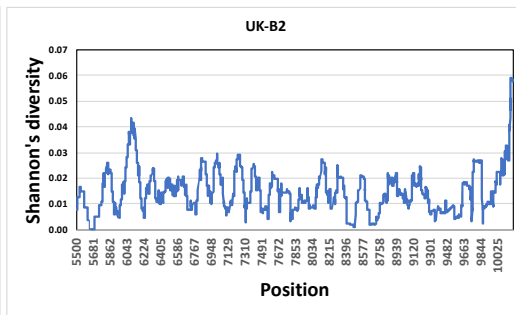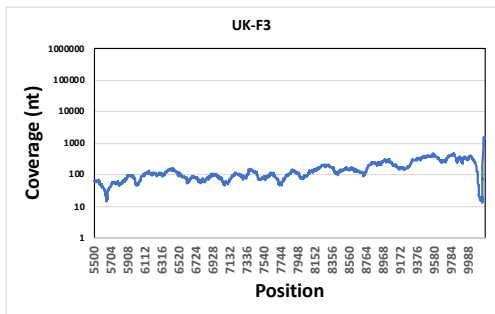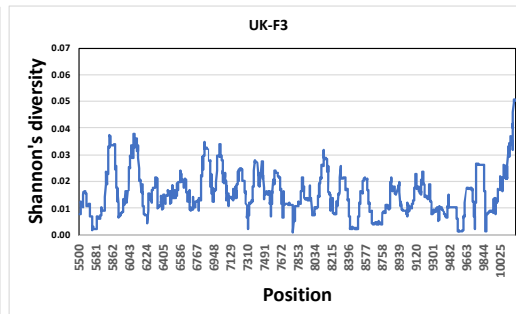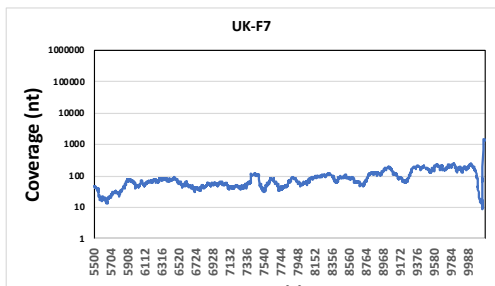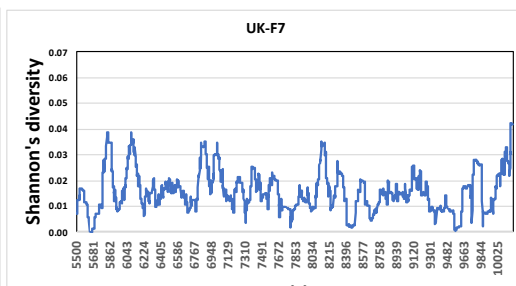

**Group 2. UK 2013 - Wild-type - High DWV**

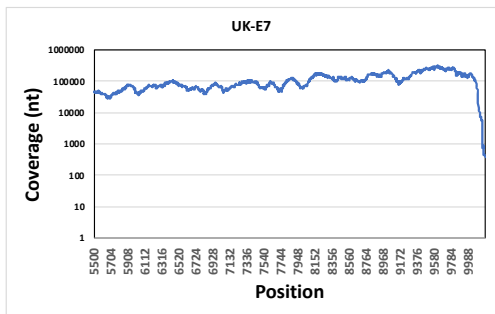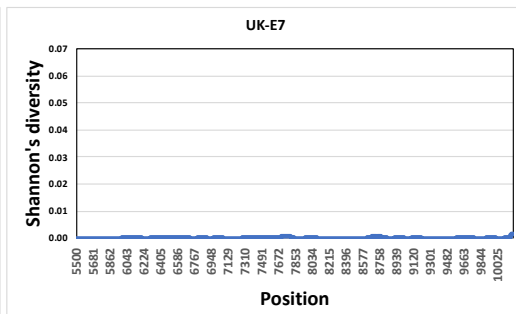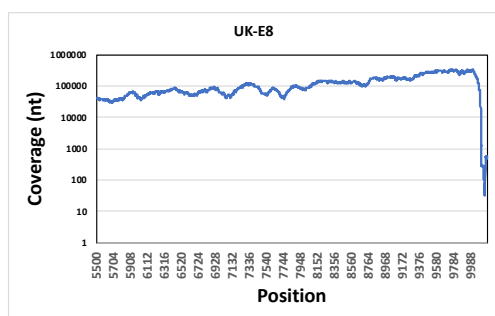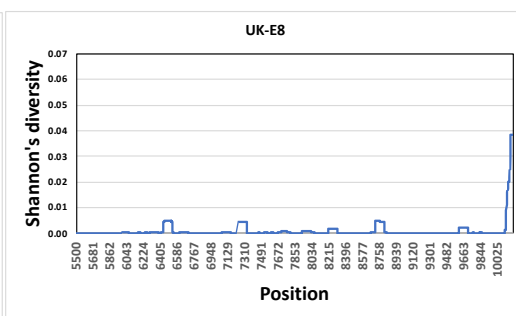

*((continued on next page))*

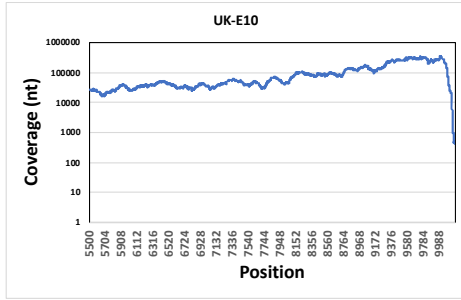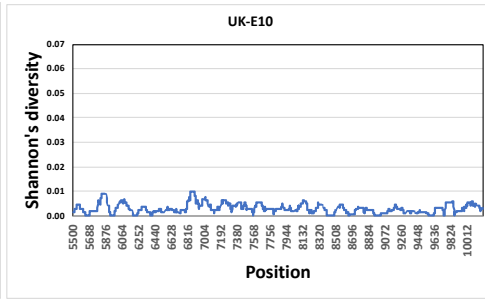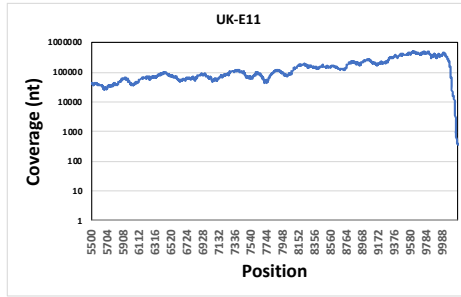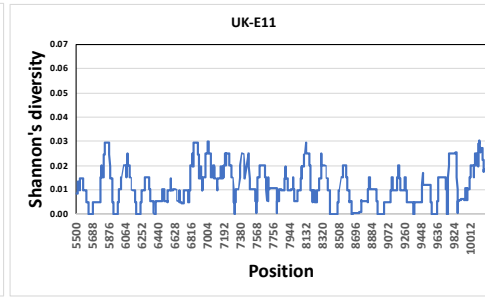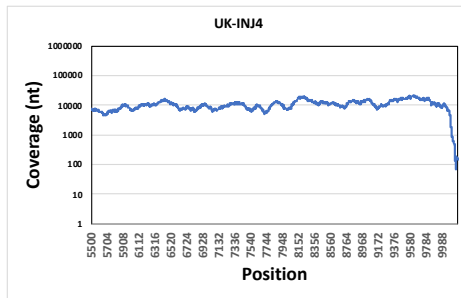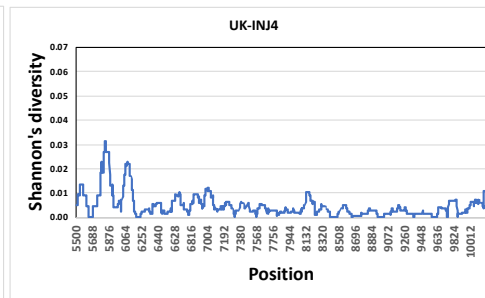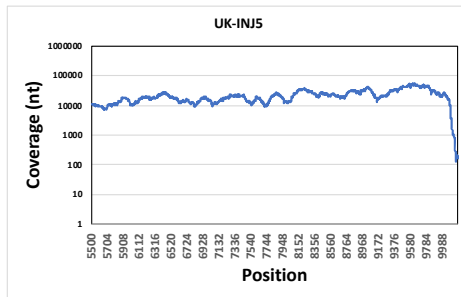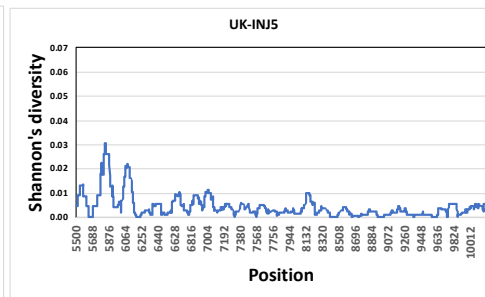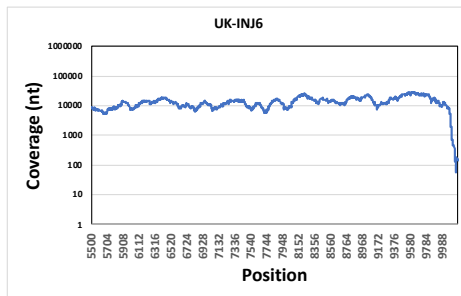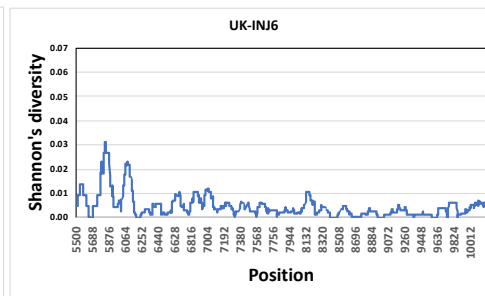

(continued on next page)

**Group 3. USA 2015-2017 - Wild-type – Low DWV**

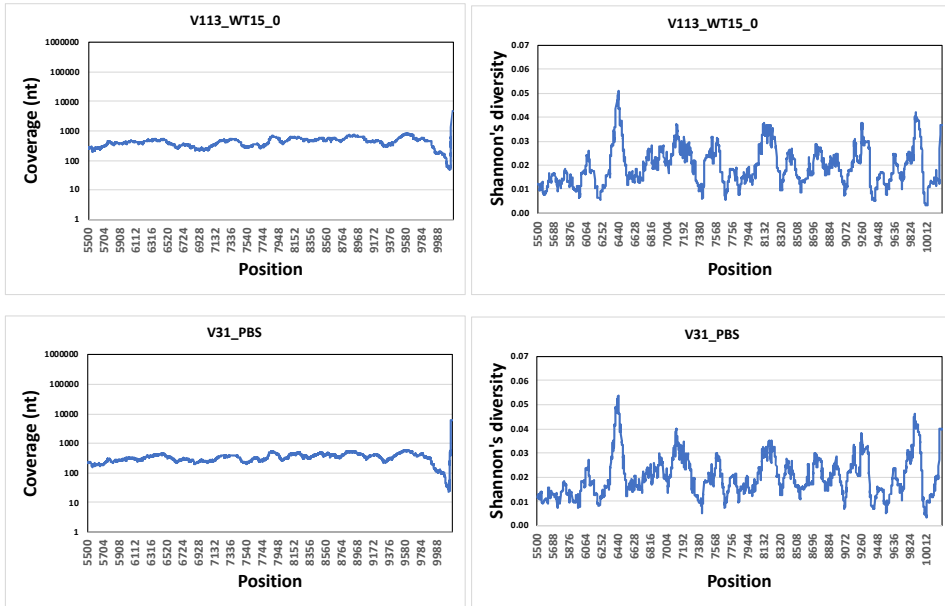

**Group 4. USA 2015-2017 - Wild-type – High DWV**

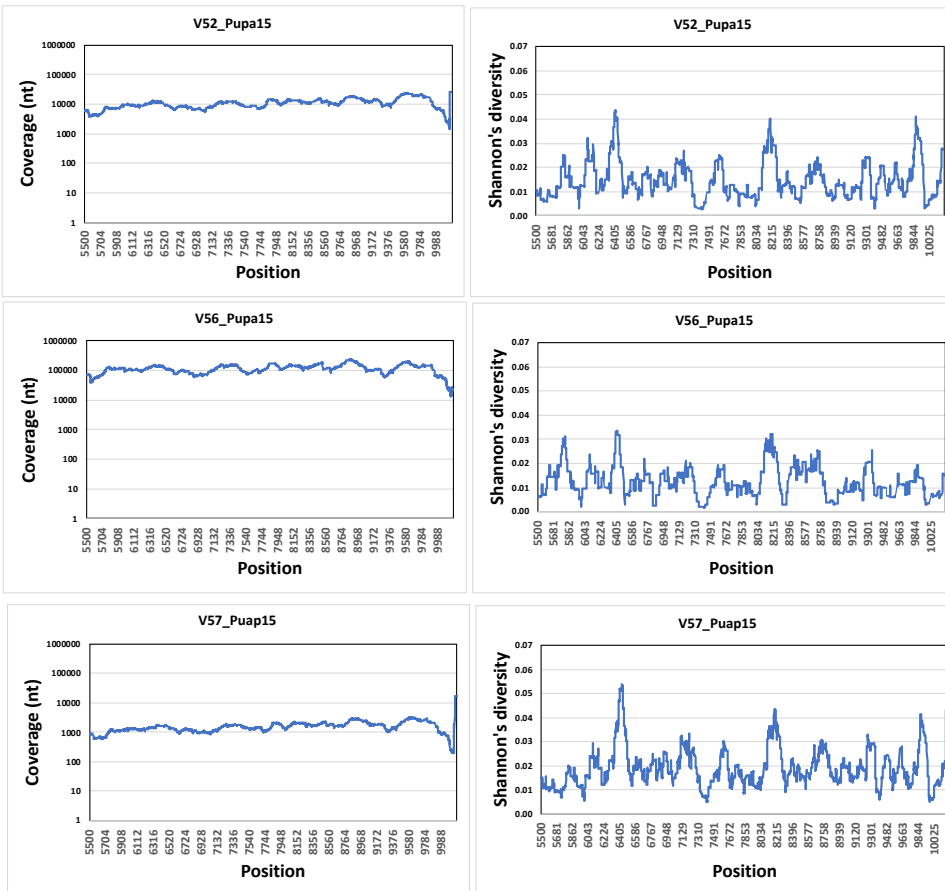

*(continued on next page)*

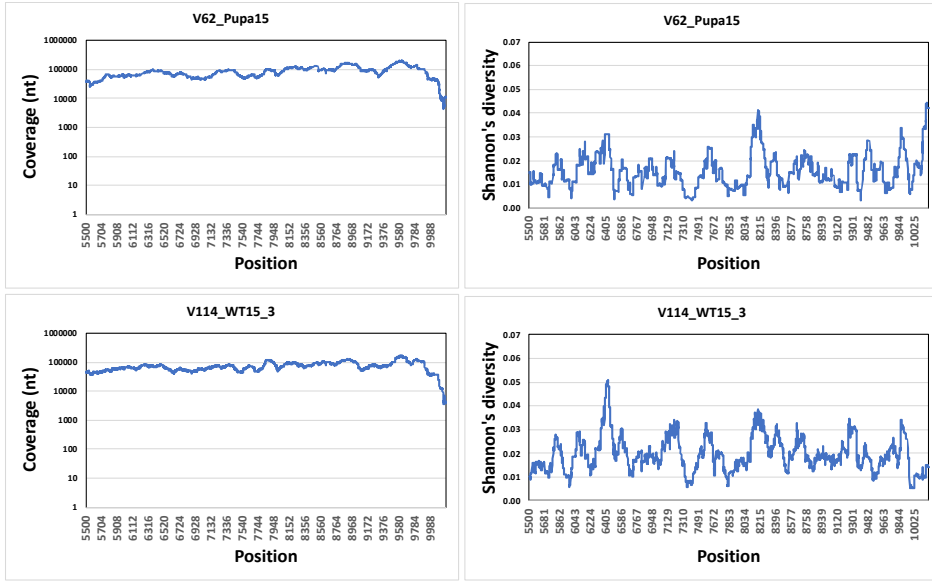

**Group 5. USA 2015 - cDNA clone-derived - High DWV**

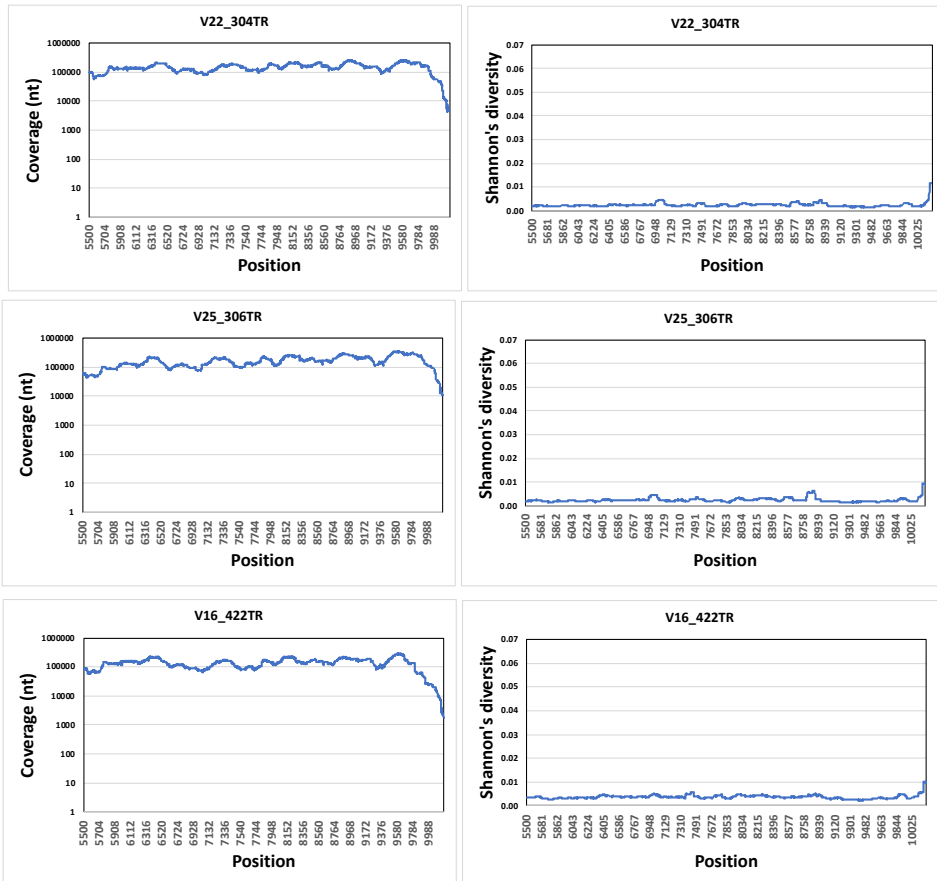

*(continued on next page)*

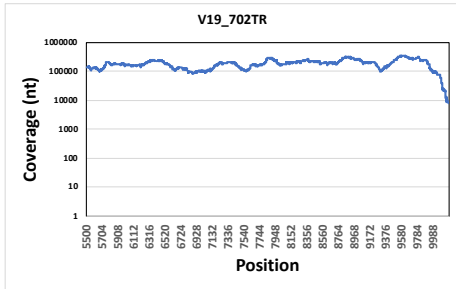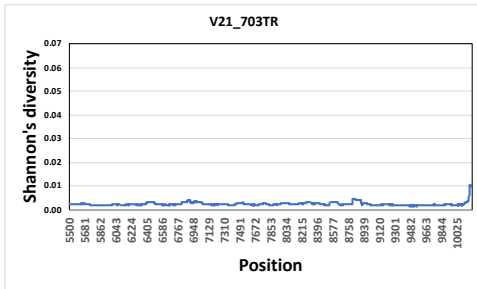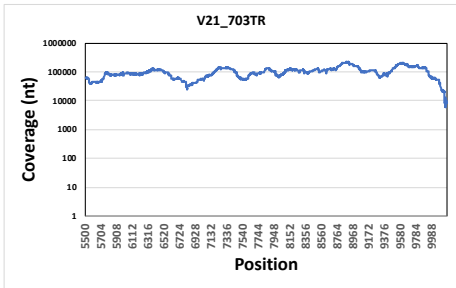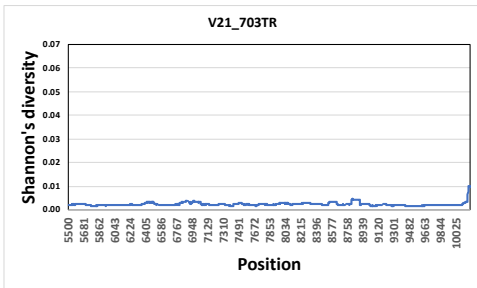

Supplement: pbio.3000502.s001.pdf [file pbio.3000502.s001.pdf]
