# Supplementary material for: Dynamic evolution in the key honey bee pathogen deformed wing virus: Novel insights into virulence and competition using reverse genetics
Source: PubMed Central journal article supplement (PMC6805011; doi:10.1371/journal.pbio.3000502), 2019-10-10
Supplement: pbio.3000502.s008.pdf [file pbio.3000502.s008.pdf]

**S1 Text 1. Double-stranded (ds) RNAs specific to the cloned DWV genotypes.**

Nucleotide alignment of the 283 nt section of DWV isolates DWV-304 and DWV-422, (Genbank accession numbers MG831200 and MG83120), positions 1242-1524 in the DWV genomic RNA, which were used to generate dsRNA.

|       |                                                               |     |
|-------|---------------------------------------------------------------|-----|
| ds304 | GGGAAGTTGATGAAGCCAGGCGGGCGCCGAGTCATCAAACGTTTGGCGCTGGAGCAAGAAC | 60  |
| ds422 | GGGAAGTTGATGAAGCCAGGCGGGCGCCGAGTCATCAAACGTTTGGCGCTAGAGCAAGAAC | 60  |
|       | *****                                                         |     |
| ds304 | GTATTCGCAACGTTCTTGACGCCGGCGTCTATGACCAGGCGACATGGGAACAGGAGGACG  | 120 |
| ds422 | GTATTCGTAACGTTCTTGACGCTAGCGTCTATGACCAGGCGACATGGGAACAGGAGGACG  | 120 |
|       | *****                                                         |     |
| ds304 | CGCGCGATAATGAGTTCCTAACGGAACAATTAACAATTTATATACTATTTATTCGATCG   | 180 |
| ds422 | TGCGCGATAATGAGTTCCTAACGGAACAATTAATAATTTATATATTATTTATTCGATCG   | 180 |
|       | *****                                                         |     |
| ds304 | CCGAACGTTGCACGCGTCGACCTATTAAGAGCACTCTCCTATATCAGTTTCGAATAGGT   | 240 |
| ds422 | CTGAACGTTGTATGCGTCGGCCTATTAAGAGCACTCTCCTATATCAGTTTCGAATAGGT   | 240 |
|       | * ***** *                                                     |     |
| ds304 | TTGCTCCATTGGAATCCCTCAAAGTCGAGGTCGGTCAAGAAGC                   | 283 |
| ds422 | TTGCTCCACTGGAATCCCTCAAAGTCGAGGTCGGTCAAGAAGC                   | 283 |
|       | *****                                                         |     |
